# Supplementary material
Source: MDPI journal article supplement (https://www.mdpi.com/2220-9964/10/8/522)
Supplement: s1 [file s1 › ijgi-1261114-supplementary.pdf]

# Supplementary Materials: Annual Actual Evapotranspiration via GIS Models of Three Empirical Methods Employing Remote-Sensed Data Compared with Annual MODIS ET for Peloponnese, Greece, and Pan Evaporation Measurements.

Stavroula Dimitriadou and Konstantinos G. Nikolakopoulos

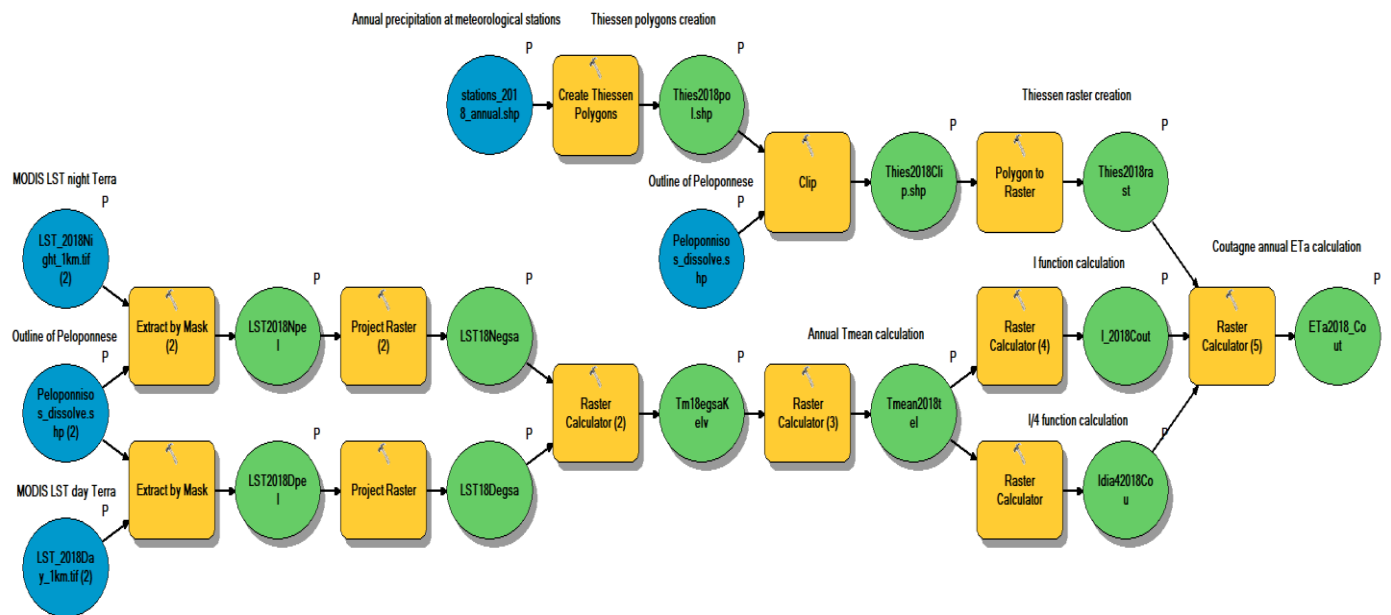

Figure S1.

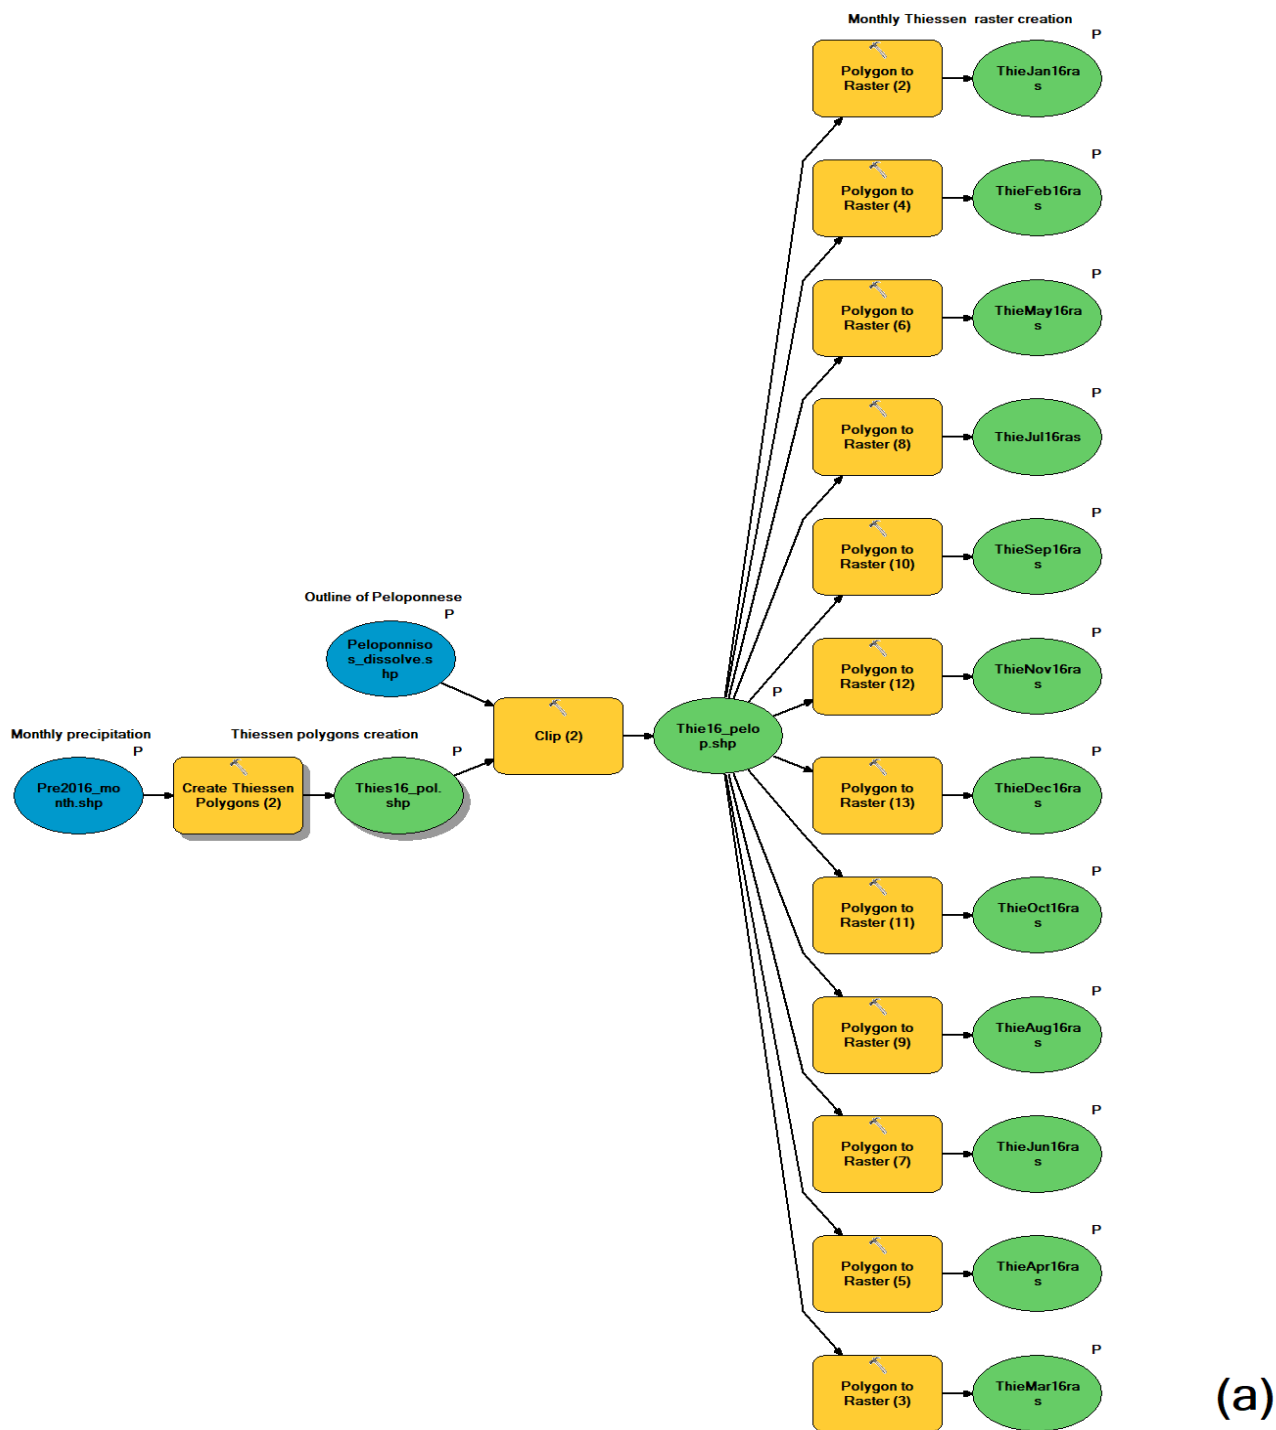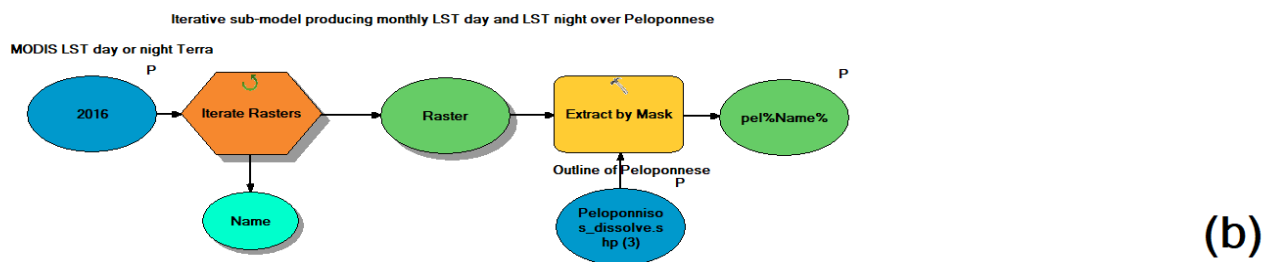

Figure S2.

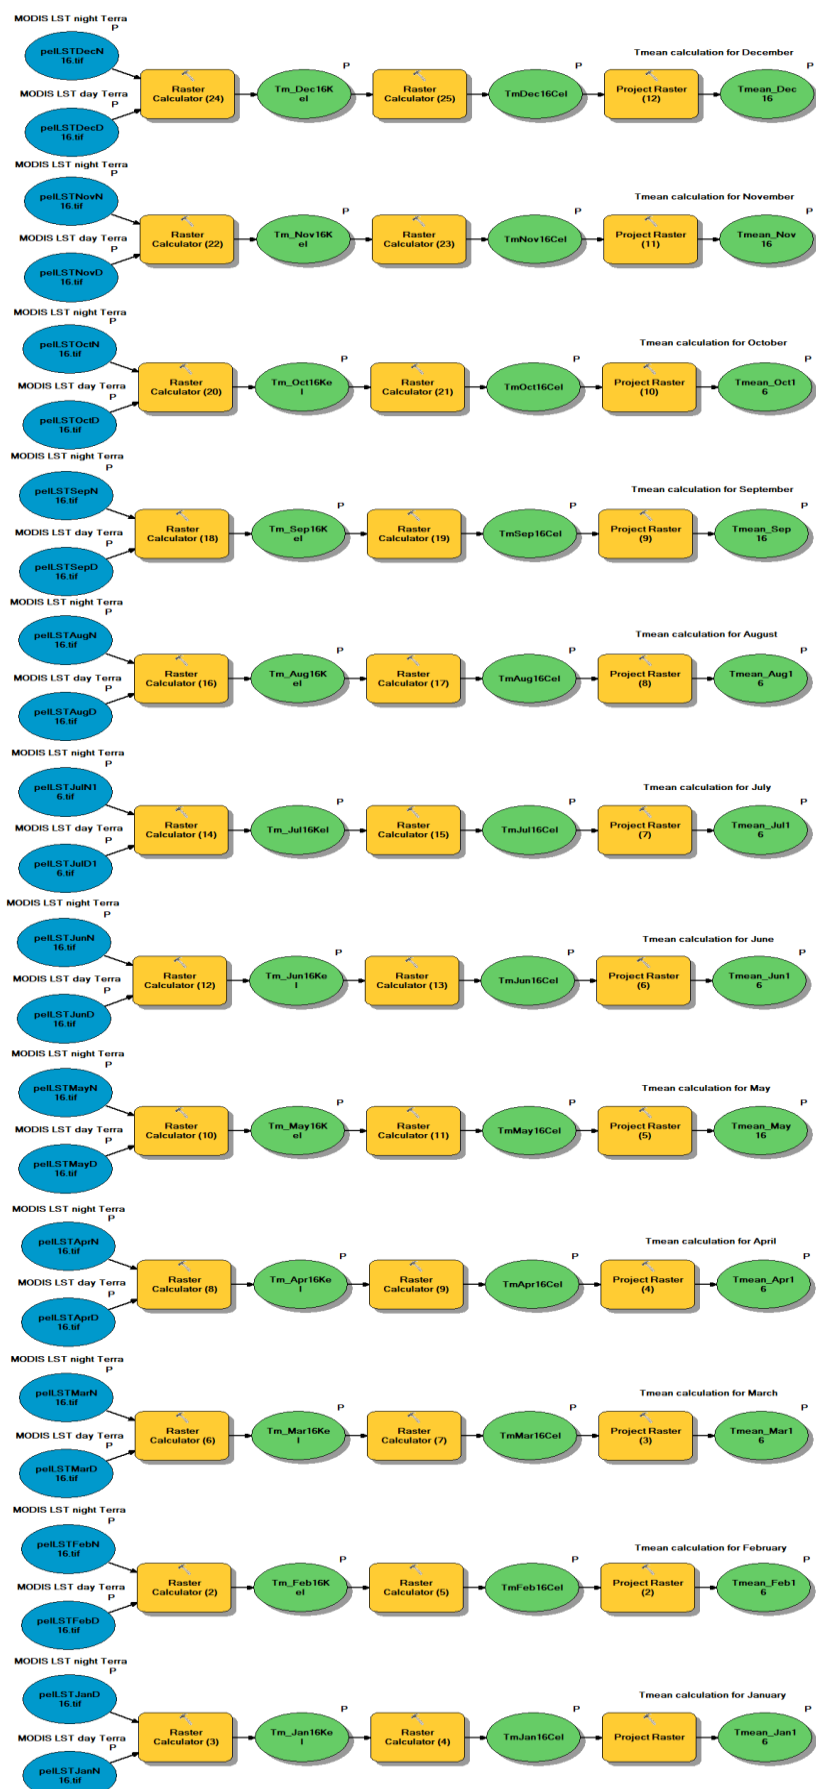

Figure S3.

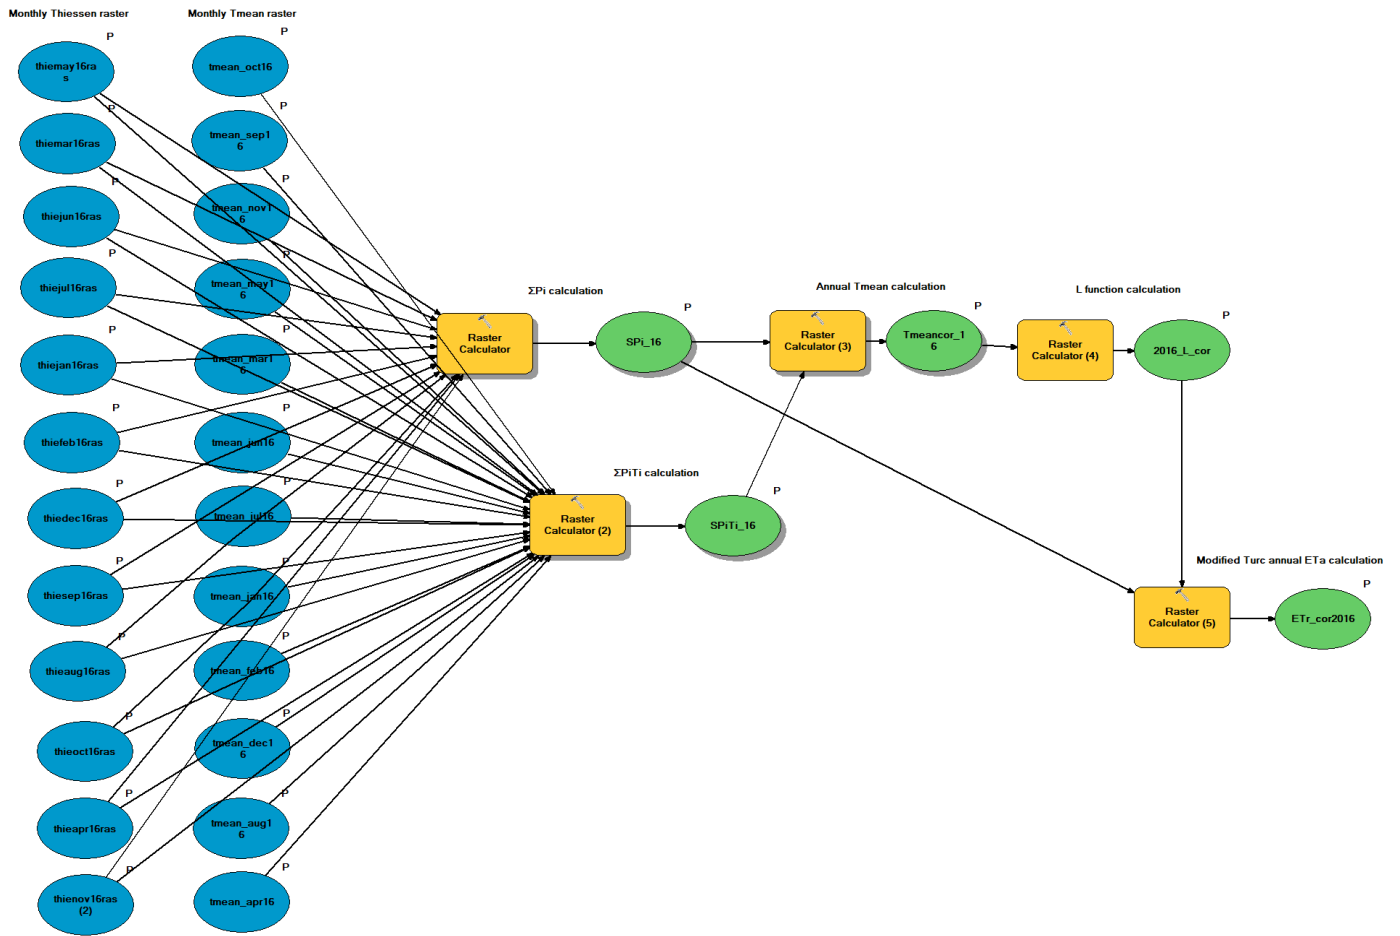

Figure S4.

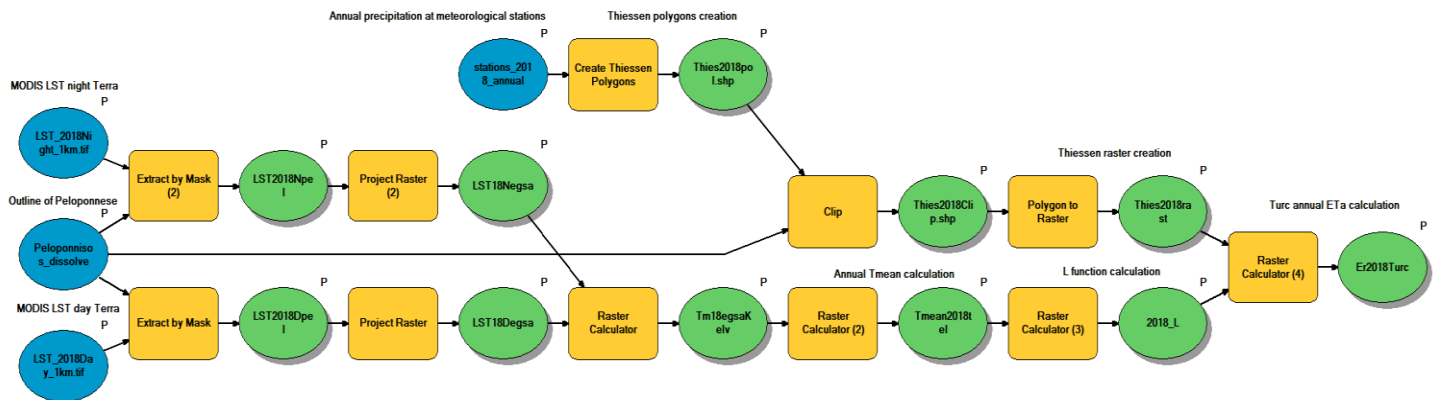

Figure S5.
